# Supplementary material for: Predictive modeling targets thymidylate synthase ThyX in Mycobacterium tuberculosis
Source: PubMed Central journal article supplement (PMC4901301; doi:10.1038/srep27792), 2016-06-10
Supplement: srep27792-s1.pdf [file srep27792-s1.pdf]

Supplementary information

**Predictive modeling targets thymidylate synthase ThyX in *Mycobacterium tuberculosis***

Kamel Djaout<sup>1</sup>, Vinayak Singh<sup>2</sup>, Yap Boum<sup>3,4</sup>, Victoria Katawera<sup>3</sup>, Hubert F. Becker<sup>1,5</sup>, Natassja G. Bush<sup>6</sup>, Stephen J. Hearnshaw<sup>6,¶</sup>, Jennifer E. Pritchard<sup>6§</sup>, Pauline Bourbon<sup>7</sup>, Peter B. Madrid<sup>7</sup>, Anthony Maxwell<sup>6</sup>, Valerie Mizrahi<sup>2</sup>, Hannu Myllykallio<sup>1\*</sup> & Sean Ekins<sup>8,9,\*</sup>

<sup>1</sup>LOB, Ecole polytechnique, CNRS, INSERM, Université Paris-Saclay, 91128 Palaiseau cedex, France.

<sup>2</sup>MRC/NHLS/UCT Molecular Mycobacteriology Research Unit & DST/NRF Centre of Excellence for Biomedical TB Research, Institute of Infectious Diseases and Molecular Medicine and Division of Medical Microbiology, Faculty of Health Sciences, University of Cape Town, AnzioRoad, Observatory 7925, Rondebosch, Cape Town 7700, South Africa.

<sup>3</sup>Epicentre Mbarara Research Centre, Mbarara, Uganda.

<sup>4</sup>Microbiology Department, Faculty of Medicine, Mbarara University of Science and Technology, Mbarara, Uganda

<sup>5</sup>Sorbonne Universités, UPMC Univ Paris 06, 4 Place Jussieu, 75005 Paris (France)

<sup>6</sup>Department of Biological Chemistry, John Innes Centre, Norwich Research Park, Norwich NR4 7UH, UK.

<sup>7</sup>SRI International, 333 Ravenswood Avenue, Menlo Park, CA 94025, USA.

<sup>8</sup>Collaborative Drug Discovery, 1633 Bayshore Highway, Suite 342, Burlingame, CA 94403, USA

<sup>9</sup>Collaborations in Chemistry, 5616 Hilltop Needmore Road, Fuquay-Varina, NC 27526, USA.

**Present addresses:**

<sup>†</sup>Stephen Hearnshaw, Inspiralis Ltd., Norwich Biocubator, Norwich Research Park, Colney Lane, Norwich NR4 7UH, UK

<sup>§</sup>Jennifer Pritchard, Birkbeck College, Univ. London WC1E 7HX, UK

**Running Head:** ThyX inhibitors for *Mtb*

**Key words:** Bayesian models; Cheminformatics; thymidylate synthase; ThyX; DNA gyrase; Machine learning; *Mycobacterium tuberculosis*; Pharmacophore; naphthoquinones

**Supplementary Figure 1.** Bayesian Model for ThyX inhibitors A. Receiver operator curve (ROC) for 5 fold cross validation demonstrating an ROC of 0.78, B Good features in the model, C. bad features in the model.

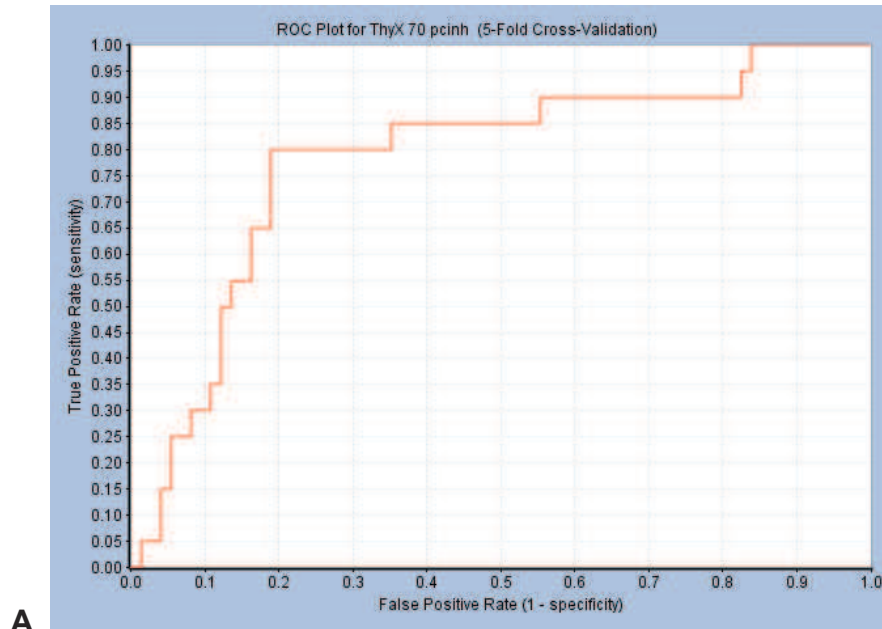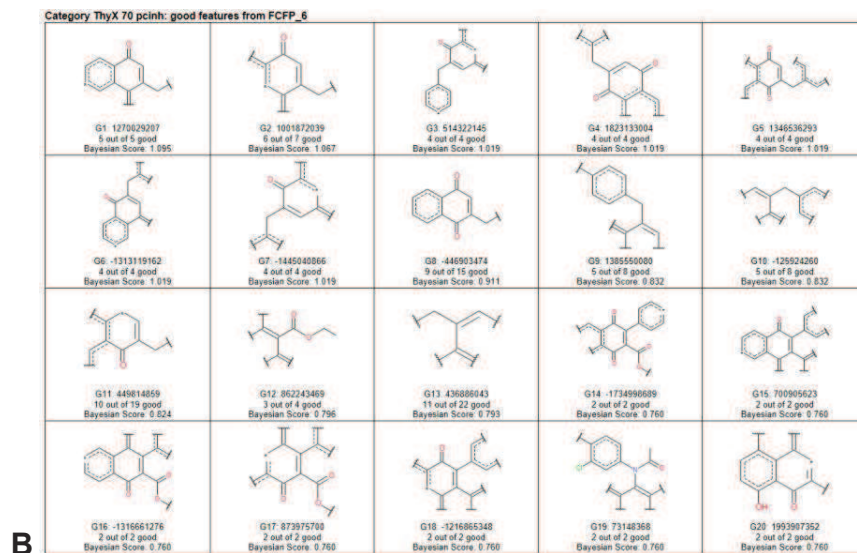

Category ThyX 70 pcinh: bad features from FCFP\_6

|                                                                                                                                                  |                                                                                                                                                 |                                                                                                                                                 |                                                                                                                                                 |                                                                                                                                                   |
|--------------------------------------------------------------------------------------------------------------------------------------------------|-------------------------------------------------------------------------------------------------------------------------------------------------|-------------------------------------------------------------------------------------------------------------------------------------------------|-------------------------------------------------------------------------------------------------------------------------------------------------|---------------------------------------------------------------------------------------------------------------------------------------------------|
| 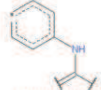<br>B1 -1838187238<br>0 out of 18 good<br>Bayesian Score -1.531 | <br>B2 1204255210<br>1 out of 25 good<br>Bayesian Score -1.104 | <br>B3 590925877<br>1 out of 25 good<br>Bayesian Score -1.104  | <br>B4 -876042518<br>0 out of 10 good<br>Bayesian Score -1.103 | <br>B5 -1124372982<br>1 out of 22 good<br>Bayesian Score -0.999 |
| <br>B6 -773883804<br>1 out of 21 good<br>Bayesian Score -0.961  | <br>B7 2110517505<br>1 out of 20 good<br>Bayesian Score -0.921 | <br>B8 307419094<br>0 out of 7 good<br>Bayesian Score -0.879   | <br>B9 5<br>0 out of 7 good<br>Bayesian Score -0.879           | <br>B10 -1320007763<br>0 out of 7 good<br>Bayesian Score -0.879 |
| <br>B11 147312702<br>0 out of 7 good<br>Bayesian Score -0.879   | <br>B12 -769354465<br>0 out of 7 good<br>Bayesian Score -0.879 | <br>B13 1609329990<br>0 out of 7 good<br>Bayesian Score -0.879 | <br>B14 1673298883<br>0 out of 7 good<br>Bayesian Score -0.879 | <br>B15 -792685140<br>0 out of 7 good<br>Bayesian Score -0.879  |
| <br>B16 -857837036<br>0 out of 7 good<br>Bayesian Score -0.879  | <br>B17 24<br>0 out of 6 good<br>Bayesian Score -0.792         | <br>B18 -882165685<br>0 out of 6 good<br>Bayesian Score -0.792 | <br>B19 307657422<br>0 out of 6 good<br>Bayesian Score -0.792  | <br>B20 -2094544316<br>0 out of 6 good<br>Bayesian Score -0.792 |

C

**Supplementary Figure 2.** Bayesian model generated using FCFP6 descriptors only with CDD Models software (part of CDD Vault software <http://www.collaboratedrug.com/register>) showing 3 fold cross validation Receiver operator curve (ROC).

| Protocol Definition <a href="#">Edit protocol definition</a> |                                                                         |
|--------------------------------------------------------------|-------------------------------------------------------------------------|
| Name:                                                        | ThyX greater than 70% inh                                               |
| Category:                                                    | QSAR Model                                                              |
| Model:                                                       | CDD's open source modified Bayesian model described in Xia et al. 2004. |
| Descriptors:                                                 | CDD's open source FCFP6 fingerprints described in Rogers and Hahn 2010. |
| Description:                                                 |                                                                         |

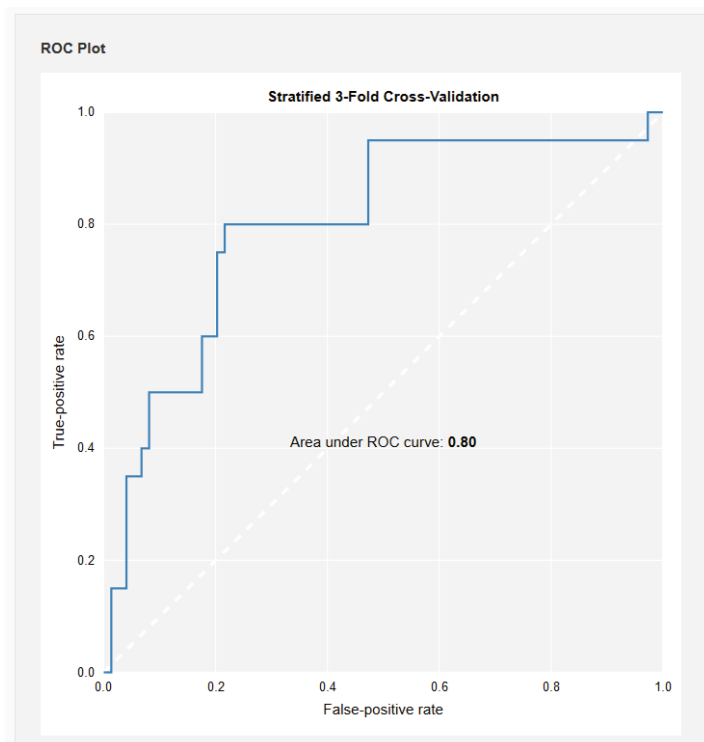

### Training Set

"Good" molecules: 20 

Other molecules: 74  taken from protocol [TB ThyX - Hannu](#)

### Readout Definitions

| Name               | Data Type | Unit | Condition? | Description                                                        |
|--------------------|-----------|------|------------|--------------------------------------------------------------------|
| Score              | Number    |      |            | Relative score (higher is better)                                  |
| Applicability      | Number    |      |            | Fraction of structural features shared with the training set       |
| Maximum similarity | Number    |      |            | Maximum Tanimoto/Jaccard similarity to any of the "good" molecules |

**Supplementary Table 1.** Initial molecules used for generating pharmacophores for ThyX and GyrB

| Compound        | Structure                                                                           | IC <sub>50</sub> gyrase | IC <sub>50</sub> ThyX |
|-----------------|-------------------------------------------------------------------------------------|-------------------------|-----------------------|
| 2E04            | 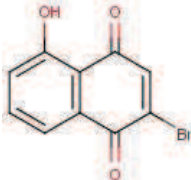   | >50 μM                  | 5 μM                  |
| C8-C1           |    | No inhibition           | 4.5 μM                |
| Diospyrin       |   | 15 μM                   | No inhibition         |
| Neodiospyrin    |  | 50 μM                   | 20 μM                 |
| 7-methyljuglone |  | 30 μM                   | 35 μM                 |
| Isodiospyrin    |  | 100 μM                  | n.d.                  |

**Supplementary Table 2. Compounds with no activity against gyrase at 100  $\mu$ M**

| Chemical name                                                                   | Chemical structure                                                                   |
|---------------------------------------------------------------------------------|--------------------------------------------------------------------------------------|
| benzyl [(4-butyl-6-chloro-2-oxo-2H-chromen-7-yl)oxy]acetate                     | 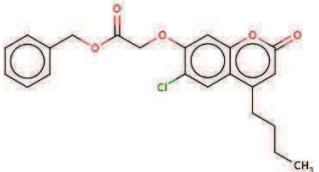    |
| methyl {[6-ethyl-3-(4-methoxyphenyl)-4-oxo-4H-chromen-7-yl]oxy}acetate          |    |
| 2-ethoxyethyl [(2-oxo-4-phenyl-2H-chromen-7-yl)oxy]acetate                      |     |
| ethyl [(6-chloro-4-ethyl-2-oxo-2H-chromen-7-yl)oxy]acetate                      |   |
| methyl [(6-chloro-2-oxo-4-phenyl-2H-chromen-7-yl)oxy]acetate                    |  |
| methyl [(6-chloro-2-oxo-4-propyl-2H-chromen-7-yl)oxy]acetate                    |  |
| prop-2-en-1-yl 2-[(3-benzyl-6-chloro-4-methyl-2-oxo-2H-chromen-7-yl)oxy]acetate |  |



|                                                                                |                                                                                      |
|--------------------------------------------------------------------------------|--------------------------------------------------------------------------------------|
| 3-(3-allyl-2-imino-4-oxo-1,3-thiazolidin-5-ylidene)-1,3-dihydro-2H-indol-2-one | 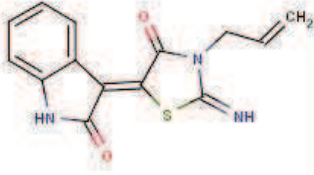    |
| 2,3-dihydro-1H-Tbenzo[b]pyrido[3,2,1-kl]phenoxazine-8,13-dione                 |     |
| Menadione                                                                      |     |
| Genistein                                                                      |    |
| Idebenone                                                                      |  |
| Taxifolin                                                                      |   |
| ethyl 3-(4-methylphenyl)-1,4-dioxonaphthalene-2-carboxylate (6)                |   |
| Secoisolariciresinol                                                           |  |
| Meropenem                                                                      |  |

|                      |                                                                                                                                                                                                                                                                                                                                                                                                                                                                                                                                                                                                                                                                                                        |
|----------------------|--------------------------------------------------------------------------------------------------------------------------------------------------------------------------------------------------------------------------------------------------------------------------------------------------------------------------------------------------------------------------------------------------------------------------------------------------------------------------------------------------------------------------------------------------------------------------------------------------------------------------------------------------------------------------------------------------------|
| <p>Pravastatin</p>   | 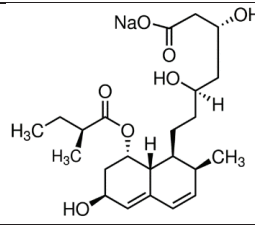 <p>The chemical structure of Pravastatin sodium salt is shown. It features a six-membered lactone ring fused to a six-membered ring with a double bond and a hydroxyl group. A side chain with a methyl group and a hydroxyl group is attached to the lactone ring. Another side chain with a methyl group and a hydroxyl group is attached to the second ring. A third side chain with a methyl group and a hydroxyl group is attached to the third ring. A fourth side chain with a methyl group and a hydroxyl group is attached to the fourth ring. A sodium salt group (NaO) is attached to the fifth ring.</p> |
| <p>Dexamethasone</p> |  <p>The chemical structure of Dexamethasone is shown. It features a four-ring steroid nucleus. The A ring has a ketone group and a double bond. The B ring has a methyl group and a hydroxyl group. The C ring has a methyl group and a hydroxyl group. The D ring has a methyl group and a hydroxyl group. A side chain with a methyl group and a hydroxyl group is attached to the D ring. A sodium salt group (NaO) is attached to the D ring.</p>                                                                                                                                                                |

**Supplementary Table 3.** Molecules in ThyX pharmacophore model with 18 molecules (N18)

| Molecule Smiles                                                         | Identifier | Principal | Max omit features |
|-------------------------------------------------------------------------|------------|-----------|-------------------|
| <chem>Oc1cccc2C(=O)C(=CC(=O)c12)Br</chem>                               | cpd1       | 2         | 0                 |
| <chem>COc1ccc(CC2=C(O)C(=O)c3ccccc3C2=O)cc1</chem>                      | cpd2       | 2         | 0                 |
| <chem>Cc1cc(O)c2C(=O)C=C(C(=O)c2c1)c3c(C)cc4C(=O)C=CC(=O)c4c3O</chem>   | cpd3       | 0         | 0                 |
| <chem>Cc1cc(O)c2C(=O)C=C(C(=O)c2c1)c3c(C)cc(O)c4C(=O)C=CC(=O)c34</chem> | cpd4       | 1         | 0                 |
| <chem>Cc1cc(O)c2C(=O)C=CC(=O)c2c1</chem>                                | cpd5       | 1         | 0                 |
| <chem>CCN(CC)c1ccc(NC2=C(Cl)C(=O)c3ccccc3C2=O)cc1</chem>                | cpd7       | 0         | 0                 |
| <chem>CCOC(=O)C1=C(C(=O)c2ccccc2C1=O)c3ccc(C)cc3</chem>                 | cpd8       | 2         | 0                 |
| <chem>CC(=O)c1c(C)[n+](O)c2ccccc2[n+][O-]</chem>                        | cpd9       | 0         | 0                 |
| <chem>[O-][n+][c1c2ccccc2[n+](O)c3ccccc13</chem>                        | cpd10      | 0         | 0                 |
| <chem>CC(=O)c1c(C)[n+](O)c2cc(Cl)c(Cl)cc2[n+][O-]</chem>                | cpd11      | 0         | 0                 |
| <chem>O=C1C2=C(N3CCc4cccc(O2)c34)C(=O)c5ccccc15</chem>                  | cpd12      | 0         | 0                 |
| <chem>CCCC1=CC(=O)Oc2cc(OCC(=O)OCc3ccccc3)c(Cl)cc12</chem>              | 6661898    | 0         | 0                 |
| <chem>CCc1ccc(cc1)C2=COc3cc(OCC(=O)OC)c(CC)cc3C2=O</chem>               | 6939246    | 0         | 0                 |
| <chem>CCOCCOC(=O)COc1ccc2C(=CC(=O)Oc2c1)c3ccccc3</chem>                 | 6970845    | 0         | 0                 |
| <chem>CCOC(=O)COc1cc2OC(=O)C=C(CC)c2cc1Cl</chem>                        | 6653343    | 0         | 0                 |
| <chem>COC(=O)COc1cc2OC(=O)C=C(c3ccccc3)c2cc1Cl</chem>                   | 5618162    | 0         | 0                 |
| <chem>CCCC1=CC(=O)Oc2cc(OCC(=O)OC)c(Cl)cc12</chem>                      | 5753116    | 0         | 0                 |
| <chem>CC1=C(Cc2ccccc2)C(=O)Oc3cc(OCC(=O)OCC=C)c(Cl)cc13</chem>          | 7105644    | 0         | 0                 |

**Supplementary Table 4.** Anti-tubercular activities of compounds identified by various screening methods

| Name | Structure                                                                            | MIC <sub>90</sub> (μM) against H37Rv |
|------|--------------------------------------------------------------------------------------|--------------------------------------|
| B6   | 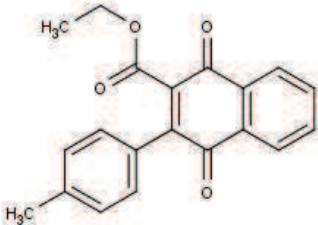   | 62.5                                 |
| D4   |   | 31.2                                 |
| D5   |  | 62.5                                 |
| E1   |  | 62.5                                 |
| E10  |  | 31.2                                 |

|           |                                                                                     |       |
|-----------|-------------------------------------------------------------------------------------|-------|
| F1        | 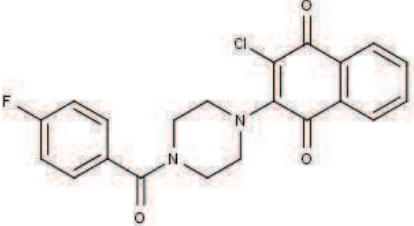  | 31.2  |
| F2        |    | 31.2  |
| Idebenone |  | 125.0 |

**Supplementary Table 5.** *Mtb* growth inhibitory activities of menadione analogs. \*5 µg/ml was the highest concentration soluble in 7H9 media with 1% ethanol as a co-solvent.

| Molecule            | Structure                                                                           | MIC (H37Rv)<br>µM |
|---------------------|-------------------------------------------------------------------------------------|-------------------|
| MK-9                | 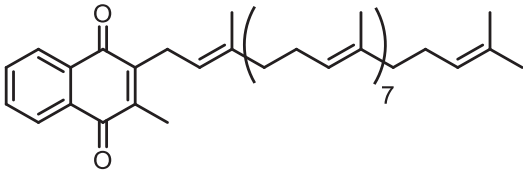  | >6.4*             |
| Menadione           |  | 98.8              |
| Menadione Bisulfate |  | 311.3             |

Supplementary Table 6. 94 molecules tested against Mtb ThyX at 100  $\mu$ M

| Structure                                                                           | Smiles                                     | Vendor source         | ID      | Purity | Inhibition at 100uM (%) | Activity class |
|-------------------------------------------------------------------------------------|--------------------------------------------|-----------------------|---------|--------|-------------------------|----------------|
| 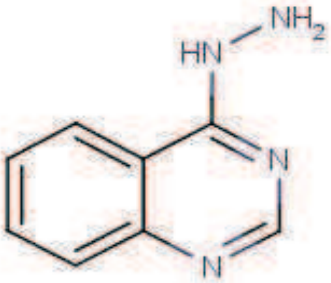   | <chem>NNC1=NC=NC2=C1C=CC=C2</chem>         | Chembridge (Hit2Lead) | 4004613 | >90%   | <20                     | 0              |
|    | <chem>CC1=CC=C2C=CC(N)=NC2=N1</chem>       | Chembridge (Hit2Lead) | 4017230 | >90%   | <20                     | 0              |
|  | <chem>COC1=CC=C(C=C1)N1C(=O)C=CC1=O</chem> | Chembridge (Hit2Lead) | 5105199 | >90%   | <20                     | 0              |

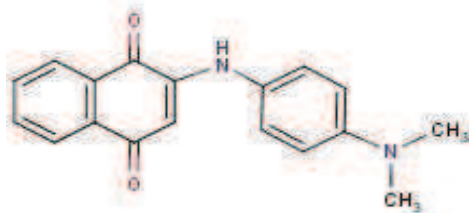

CN(C)C1=CC=C(NC2=CC(=O)C3=C(C=CC=C3)C2=O)C=C1

Chembridge (Hit2Lead)

5106780

>90%

<20

0

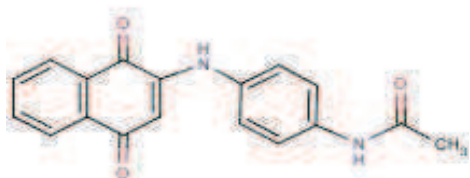

CC(=O)NC1=CC=C(NC2=CC(=O)C3=C(C=CC=C3)C2=O)C=C1

Chembridge (Hit2Lead)

5106790

>90%

20-70

0

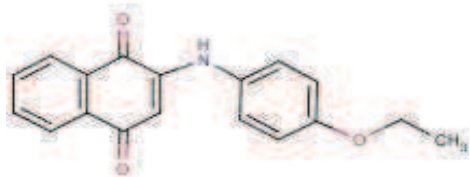

CCOC1=CC=C(NC2=CC(=O)C3=C(C=CC=C3)C2=O)C=C1

Chembridge (Hit2Lead)

5106794

>90%

<20

0



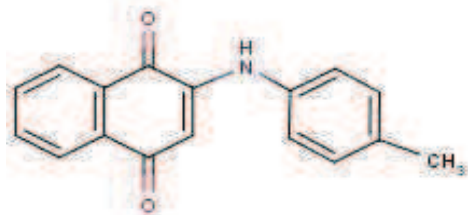

CCOC1=CC=C(NC2=CC(=O)C3=C(C=CC=C3)C2=O)C=C1

Chembridge (Hit2Lead)

5107105

>90%

<20

0

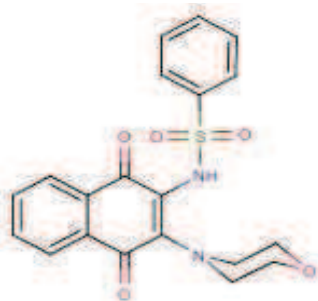

O=C1C(NS(=O)(=O)C2=CC=CC=C2)=C(N2CCOCC2)C(=O)C2=C1C=CC=C2

Chembridge (Hit2Lead)

5123492

>90%

<20

0

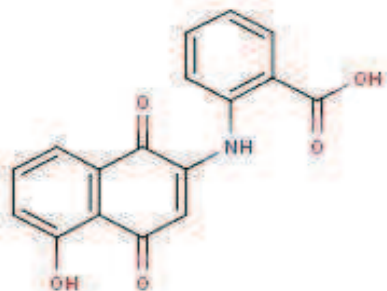

OC(=O)C1=CC=CC=C1NC1=CC(=O)C2=C(C=CC=C2O)C1=O

Chembridge (Hit2Lead)

5138303

>90%

70-90

0

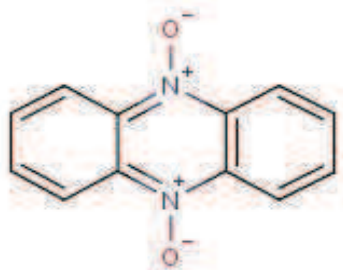

O[N+]1=C2C=CC=CC  
2=[N+](O)C2=C1C=C  
C=C2

Chembridge (Hit2Lead)

5141532

>90%

20-70

0

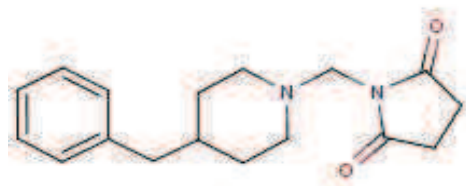

O=C1CCC(=O)N1CN  
1CCC(CC2=CC=CC=C  
2)CC1

Chembridge (Hit2Lead)

5185654

>90%

<20

0

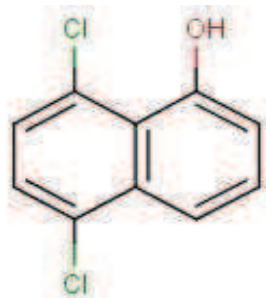

OC1=CC=CC2=C1C(C  
I)=CC=C2Cl

Chembridge (Hit2Lead)

5211912

>90%

20-70

0

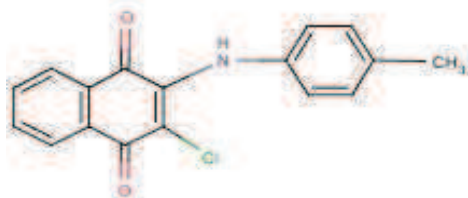

CC1=CC=C(NC2=C(Cl)  
 )C(=O)C3=C(C=CC=C  
 3)C2=O)C=C1

Chembridge (Hit2Lead)

5212518

>90%

<20

0

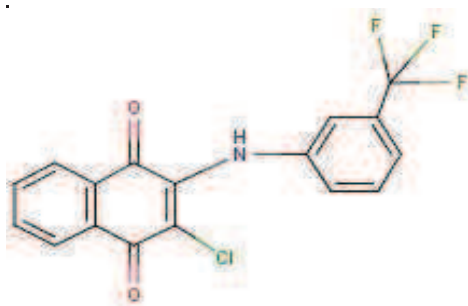

FC(F)(F)C1=CC=CC(N  
 C2=C(Cl)C(=O)C3=C(  
 C=CC=C3)C2=O)=C1

Chembridge (Hit2Lead)

5212519

>90%

<20

0

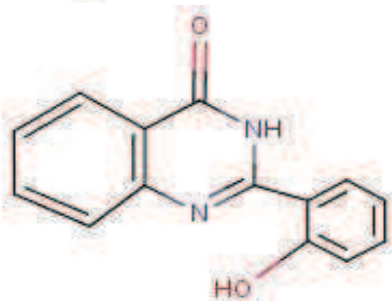

OC1=CC=CC=C1C1=  
 NC2=C(C=CC=C2)C(  
 =O)N1

Chembridge (Hit2Lead)

5213142

>90%

<20

0

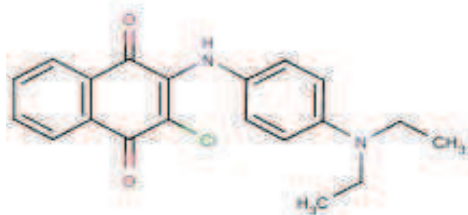

CCN(CC)C1=CC=C(N  
C2=C(Cl)C(=O)C3=C(  
C=CC=C3)C2=O)C=C  
1

Chembridge (Hit2Lead)

5213844

>90%

<20

0

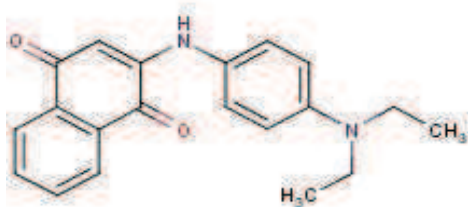

CCN(CC)C1=CC=C(N  
C2=CC(=O)C3=C(C=  
CC=C3)C2=O)C=C1

Chembridge (Hit2Lead)

5213850

>90%

<20

0

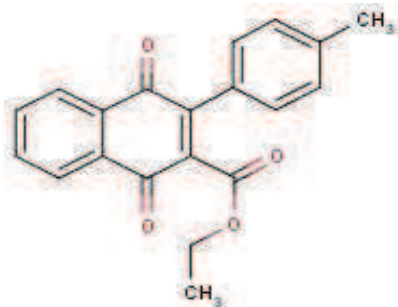

CCOC(=O)C1=C(C(=O)  
C2=C(C=CC=C2)C  
1=O)C1=CC=C(C)C=C  
C1

Chembridge (Hit2Lead)

5248599

>90%

70-90

0

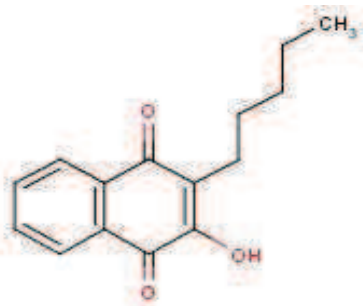

CCCCC1=C(O)C(=O)  
 )C2=C(C=CC=C2)C1=  
 O

Chembridge (Hit2Lead)

5248611

>90%

20-70

0

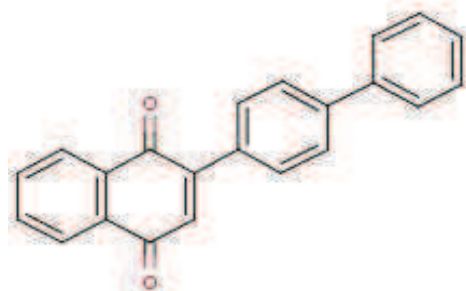

O=C1C=C(C(=O)C2=  
 C1C=CC=C2)C1=CC=  
 C(C=C1)C1=CC=CC=  
 C1

Chembridge (Hit2Lead)

5249293

>90%

<20

0

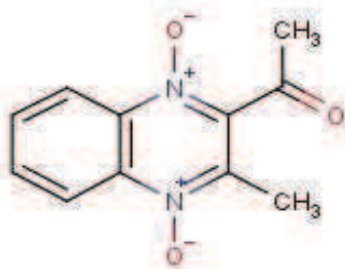

CC(=O)C1=[N+](O)C  
 2=C(C=CC=C2)[N+](  
 O)=C1C

Chembridge (Hit2Lead)

5324085

>90%

<20

0

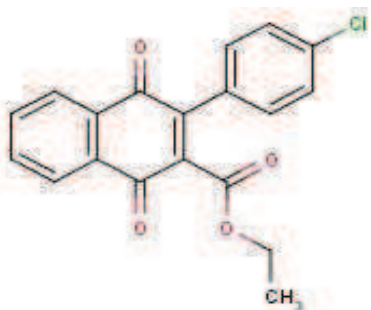

CCOC(=O)C1=C(C(=O)C2=C(C=CC=C2)C1=O)C1=CC=C(Cl)C=C1

Chembridge (Hit2Lead)

5325840

>90%

70-90

0

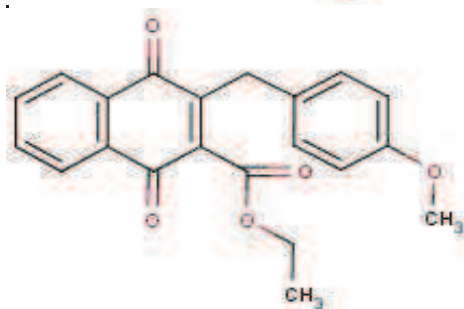

CCOC(=O)C1=C(CC2=CC=C(OC)C=C2)C(=O)C2=C(C=CC=C2)C1=O

Chembridge (Hit2Lead)

5325842

>90%

70-90

0

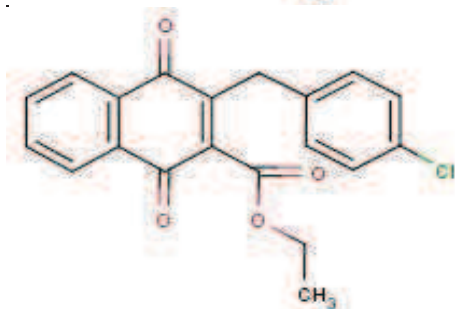

CCOC(=O)C1=C(CC2=CC=C(Cl)C=C2)C(=O)C2=C(C=CC=C2)C1=O

Chembridge (Hit2Lead)

5325846

>90%

20-70

0

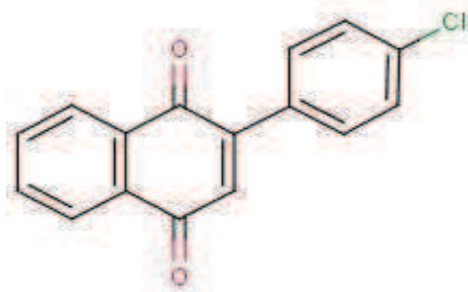

ClC1=CC=C(C=C1)C1=CC(=O)C2=C(C=CC=C2)C1=O

Chembridge (Hit2Lead)

5325855

>90%

20-70

0

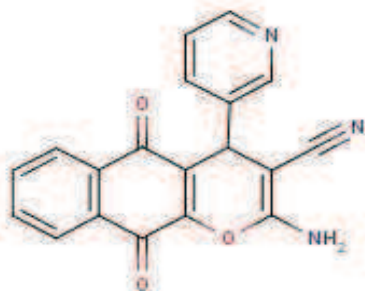

NC1=C(C#N)C(C2=C(C#N=C2)C2=C(O1)C(=O)C1=C(C=CC=C1)C2=O

Chembridge (Hit2Lead)

5397895

>90%

20-70

0

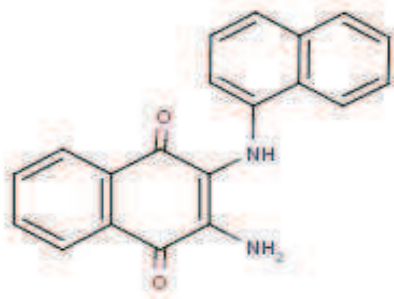

NC1=C(NC2CC=CC3=CC=CC=C23)C(=O)C2=C(C=CC=C2)C1=O

Chembridge (Hit2Lead)

5477554

>90%

<20

0

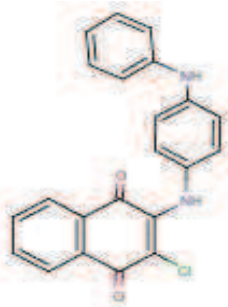

C1C1=C(NC2=CC=C(NC3=CC=CC=C3)C=C2)C(=O)C2=C(C=CC=C2)C1=O

Chembridge (Hit2Lead)

5477843

>90%

<20

0

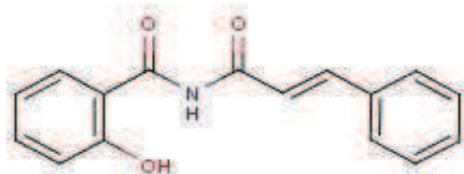

OC1=CC=CC=C1C(=O)NC(=O)C/C=C/C2=CC=CC=C2

Chembridge (Hit2Lead)

5484914

>90%

<20

0

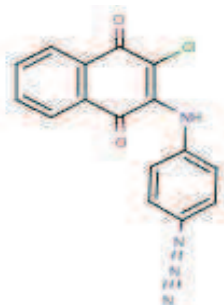

C1C1=C(NC2=CC=C(C=C2)N=[N]#N)C(=O)C2=C(C=CC=C2)C1=O

Chembridge (Hit2Lead)

5511359

>90%

20-70

0





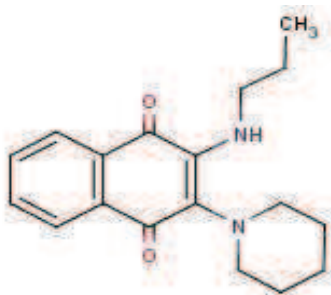

CCCNC1=C(N2CCCC  
C2)C(=O)C2=C(C=CC  
=C2)C1=O

Chembridge (Hit2Lead)

5605076

>90%

20-70

0

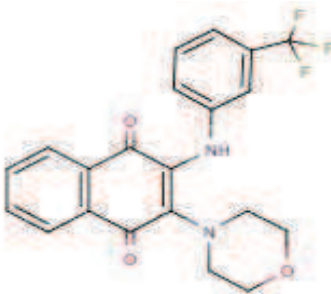

CC(C)(C)C1=CC(NC2  
=C(N3CCOCC3)C(=O  
)C3=C(C=CC=C3)C2=  
O)=CC=C1

Chembridge (Hit2Lead)

5609872

>90%

<20

0

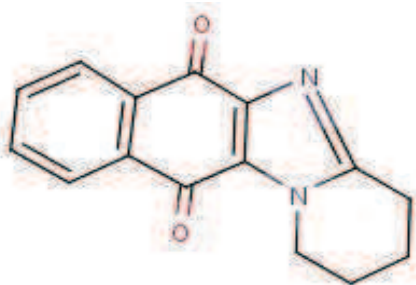

O=C1C2=C(N3CCCC  
C3=N2)C(=O)C2=C1  
C=CC=C2

Chembridge (Hit2Lead)

5626653

>90%

<20

0

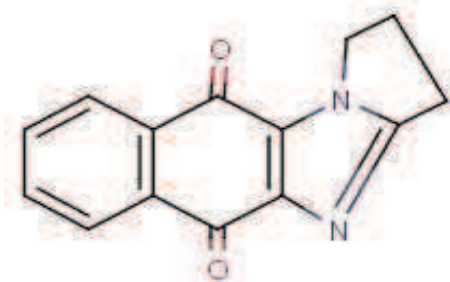

O=C1C2=C(N3CCCC  
3=N2)C(=O)C2=C1C  
=CC=C2

Chembridge (Hit2Lead)

5627696

>90%

<20

0

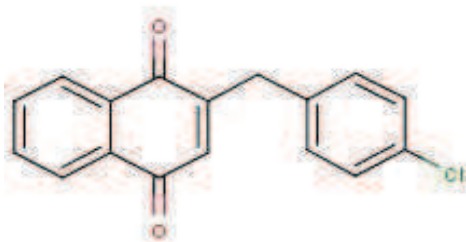

C1C1=CC=C(CC2=CC(  
=O)C3=C(C=CC=C3)  
C2=O)C=C1

Chembridge (Hit2Lead)

5706593

>90%

70-90

0

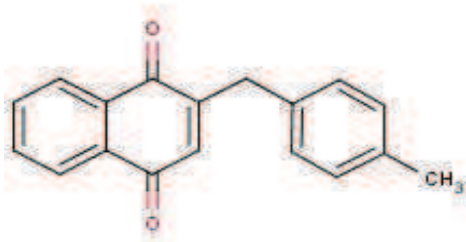

CC1=CC=C(CC2=CC(  
=O)C3=C(C=CC=C3)  
C2=O)C=C1

Chembridge (Hit2Lead)

5715755

>90%

90

1

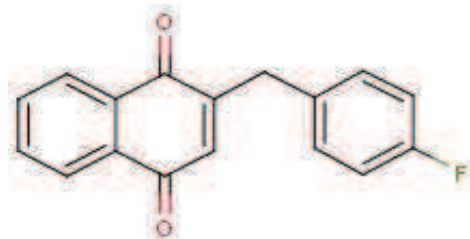

FC1=CC=C(CC2=CC(=O)C3=C(C=CC=C3)C2=O)C=C1

Chembridge (Hit2Lead)

5719928

>90%

90

1

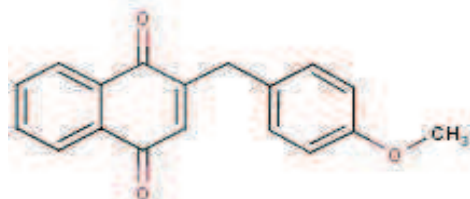

COC1=CC=C(CC2=CC(=O)C3=C(C=CC=C3)C2=O)C=C1

Chembridge (Hit2Lead)

5724526

>90%

90

1

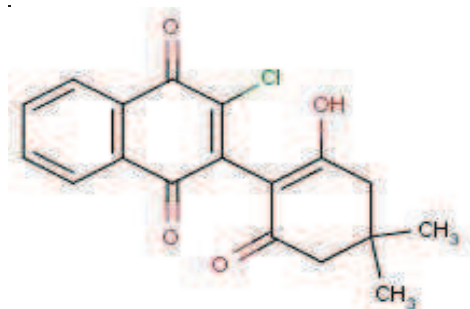

CC1(C)CC(O)=C(C(=O)C1)C1=C(Cl)C(=O)C2=C(C=CC=C2)C1=O

Chembridge (Hit2Lead)

5767783

>90%

70-90

0

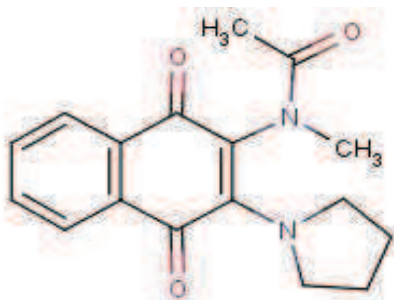

CN(C(C)=O)C1=C(N2CCCC2)C(=O)C2=C(C=CC=C2)C1=O

Chembridge (Hit2Lead)

5812253

>90%

<20

0

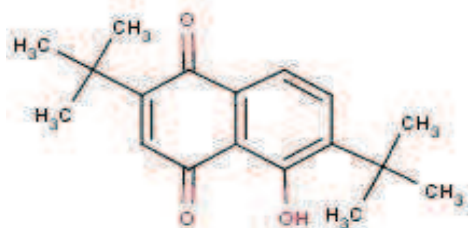

CC(C)(C)C1=CC(=O)C2=C(C=CC(=O)C2)C(C)(C)C1=O

Chembridge (Hit2Lead)

5914723

>90%

<20

0

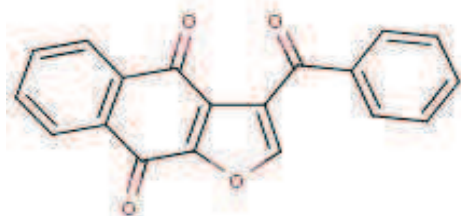

O=C(C1=COCC2=C1C(=O)C1=C(C=CC=C1)C2=O)C1=CC=CC=C1

Chembridge (Hit2Lead)

6045925

>90%

90

1

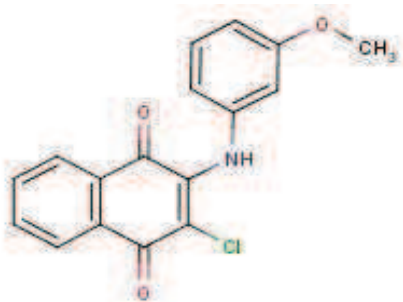

COC1=CC(NC2=C(Cl)  
C(=O)C3=C(C=CC=C  
3)C2=O)=CC=C1

Chembridge (Hit2Lead)

6575259

>90%

20-70

0

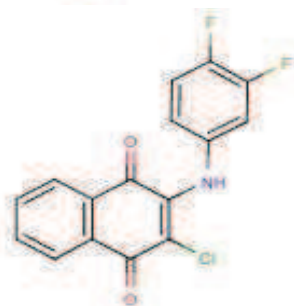

FC1=CC=C(NC2=C(Cl)  
)C(=O)C3=C(C=CC=C  
3)C2=O)C=C1F

Chembridge (Hit2Lead)

6575573

>90%

<20

0

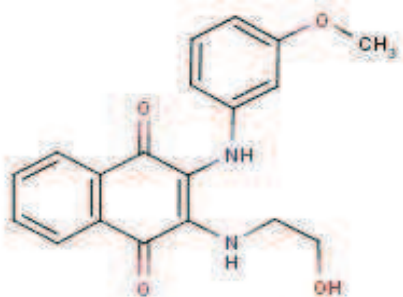

COC1=CC(NC2=C(N  
CCO)C(=O)C3=C(C=C  
C=C3)C2=O)=CC=C1

Chembridge (Hit2Lead)

6575733

>90%

<20

0

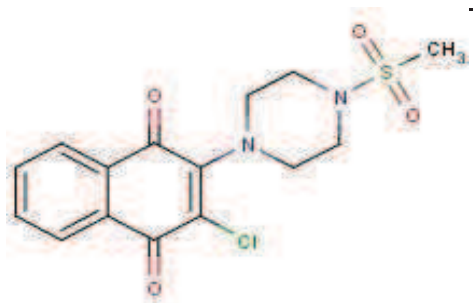

CS(=O)(=O)N1CCN(C  
C1)C1=C(Cl)C(=O)C2  
=C(C=CC=C2)C1=O

Chembridge (Hit2Lead)

6787496

>90%

90

1

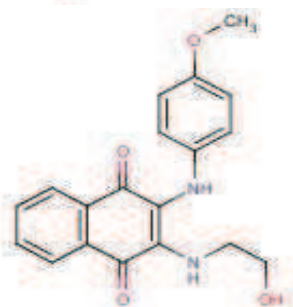

COC1=CC=C(CC2=C(  
NCCO)C(=O)C3=C(C  
=CC=C3)C2=O)C=C1

Chembridge (Hit2Lead)

6798968

>90%

<20

0

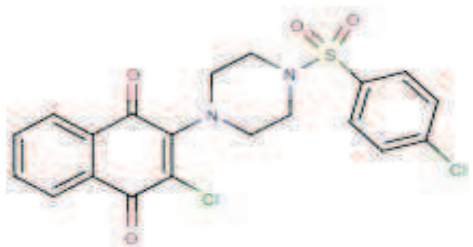

ClC1=CC=C(C=C1)S(  
=O)(=O)N1CCN(CC1)  
C1=C(Cl)C(=O)C2=C(  
C=CC=C2)C1=O

Chembridge (Hit2Lead)

6804053

>90%

<20

0

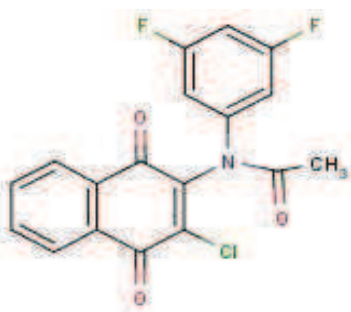

CC(=O)N(C1=CC(F)=  
CC(F)=C1)C1=C(Cl)C(  
=O)C2=C(C=CC=C2)  
C1=O

Chembridge (Hit2Lead)

6845486

>90%

20-70

0

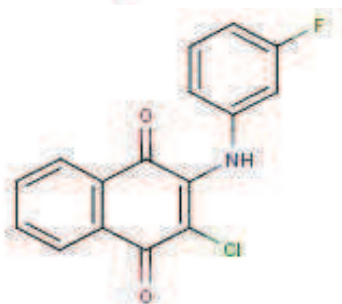

FC1=CC(NC2=C(Cl)C  
(=O)C3=C(C=CC=C3)  
C2=O)=CC=C1

Chembridge (Hit2Lead)

6848327

>90%

20-70

0

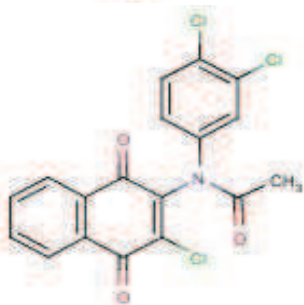

CC(=O)N(C1=CC=C(C  
l)C(Cl)=C1)C1=C(Cl)C  
(=O)C2=C(C=CC=C2)  
C1=O

Chembridge (Hit2Lead)

6854599

>90%

90

1

|  |                                                                        |                       |         |      |       |   |
|--|------------------------------------------------------------------------|-----------------------|---------|------|-------|---|
|  | CC(=O)N(C1=CC(F)=<br>CC(F)=C1)C1=C(Cl)C(<br>=O)C2=C(C=CC=C2)<br>C1=O   | Chembridge (Hit2Lead) | 6845486 | >90% | 20-70 | 0 |
|  | FC1=CC(NC2=C(Cl)C<br>(=O)C3=C(C=CC=C3)<br>C2=O)=CC=C1                  | Chembridge (Hit2Lead) | 6848327 | >90% | 20-70 | 0 |
|  | CC(=O)N(C1=CC=C(C<br>l)C(Cl)=C1)C1=C(Cl)C<br>(=O)C2=C(C=CC=C2)<br>C1=O | Chembridge (Hit2Lead) | 6854599 | >90% | 90    | 1 |



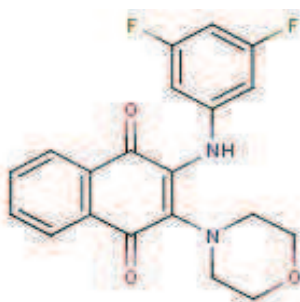

FC1=CC(NC2=C(N3C  
COCC3)C(=O)C3=C(  
C=CC=C3)C2=O)=CC  
(F)=C1

Chembridge (Hit2Lead)

6854963

>90%

<20

0

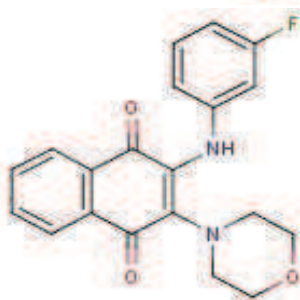

FC1=CC(NC2=C(N3C  
COCC3)C(=O)C3=C(  
C=CC=C3)C2=O)=CC  
=C1

Chembridge (Hit2Lead)

6856548

>90%

<20

0

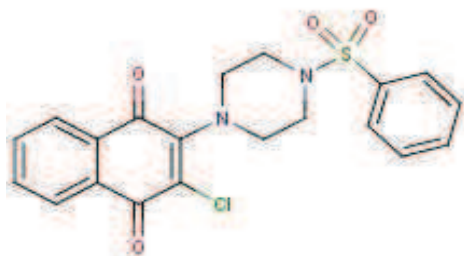

ClC1=C(N2CCN(CC2)  
S(=O)(=O)C2=CC=CC  
=C2)C(=O)C2=C(C=C  
C=C2)C1=O

Chembridge (Hit2Lead)

6868264

>90%

20-70

0

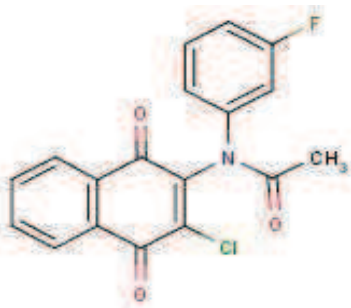

CC(=O)N(C1=CC=CC(F)=C1)C1=C(Cl)C(=O)C2=C(C=CC=C2)C1=O

Chembridge (Hit2Lead)

6868429

>90%

70-90

0

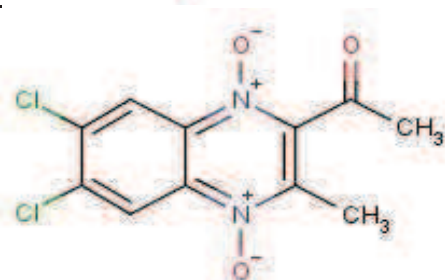

CC(=O)C1=C(C)[N+](O)=C2C=C(Cl)C(Cl)=CC2=[N+]1O

Chembridge (Hit2Lead)

6981662

>90%

<20

0

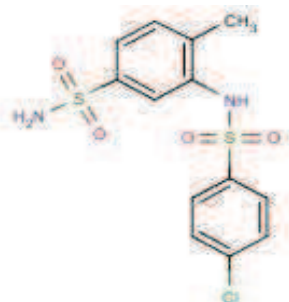

CC1=CC=C(C=C1NS(=O)(=O)C1=CC=C(Cl)C=C1)S(N)(=O)=O

Chembridge (Hit2Lead)

6996892

>90%

<20

0

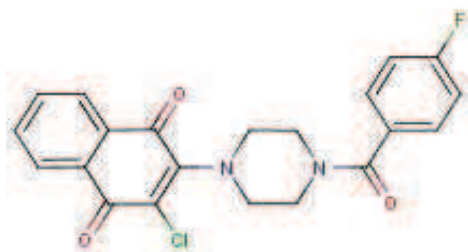

FC1=CC=C(C=C1)C(=O)N1CCN(CC1)C1=C(Cl)C(=O)C2=C(C=CC=C2)C1=O

Chembridge (Hit2Lead)

7044462

>90%

90

1

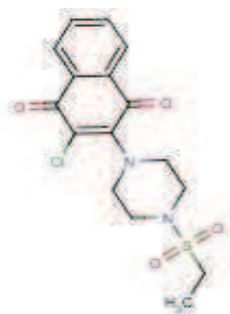

CCS(=O)(=O)N1CCN(CC1)C1=C(Cl)C(=O)C2=C(C=CC=C2)C1=O

Chembridge (Hit2Lead)

7070376

>90%

90

1

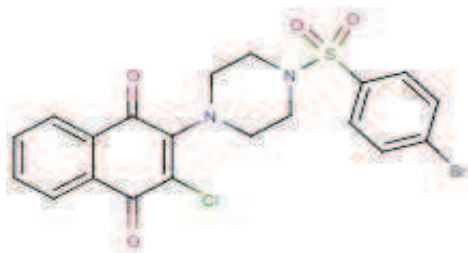

ClC1=C(N2CCN(CC2)S(=O)(=O)C2=CC=C(Br)C=C2)C(=O)C2=C(C=CC=C2)C1=O

Chembridge (Hit2Lead)

7085688

>90%

<20

0

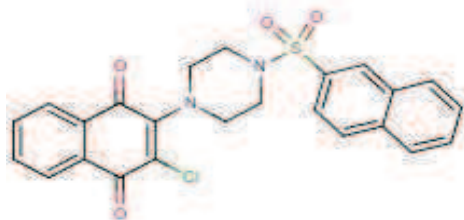

C1C=C(N2CCN(CC2)S(=O)(=O)C2=CC=C3C=CC=CC3=C2)C(=O)C2=C(C=CC=C2)C1=O

Chembridge (Hit2Lead)

7276470

>90%

<20

0

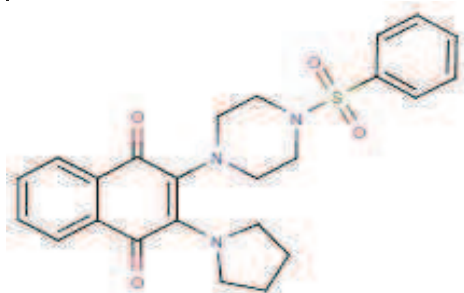

O=C1C2=C(C=CC=C2)C(=O)C(N2CCN(CC2)S(=O)(=O)C2=CC=CC=C2)C1=C(C=C2)N1CCCC1

Chembridge (Hit2Lead)

7360177

>90%

<20

0

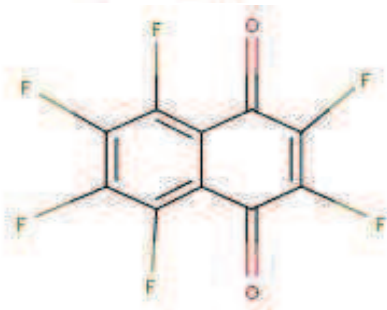

FC1=C(F)C2=C(C(F)=C1F)C(=O)C(F)=C(F)C2=O

Chembridge (Hit2Lead)

7404818

>90%

70-90

0

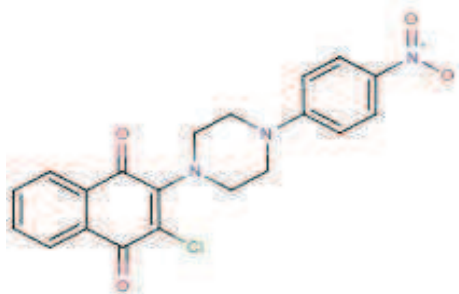

ON(=O)C1=CC=C(C=C1)N1CCN(CC1)C1=C(Cl)C(=O)C2=C(C=C2)C1=O

Chembridge (Hit2Lead)

7617556

>90%

20-70

0

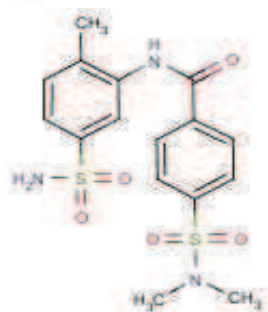

CN(C)S(=O)(=O)C1=CC=C(C=C1)C(=O)NC1=CC=C(C=C1)S(=O)(=O)N(C)C

Chembridge (Hit2Lead)

7631270

>90%

<20

0

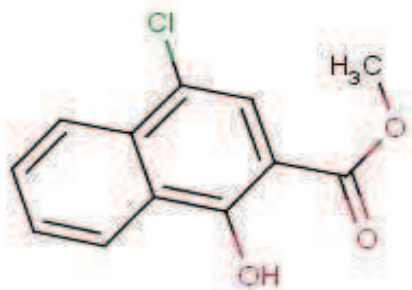

O.COC(=C)C1=C(O)C2=C(C=CC=C2)C(Cl)=C1

Chembridge (Hit2Lead)

7812749

>90%

<20

0

|                                                                                    |                                                                    |                       |         |      |       |   |
|------------------------------------------------------------------------------------|--------------------------------------------------------------------|-----------------------|---------|------|-------|---|
| 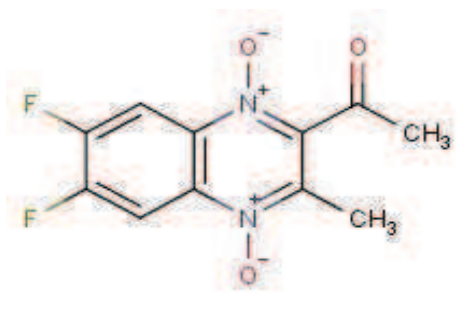  | <chem>CC(=O)C1=[N+](O)C2=C(C=C(F)C(F)=C2)[N+](O)=C1C</chem>        | Chembridge (Hit2Lead) | 8888844 | >90% | <20   | 0 |
|   | <chem>COC(=O)C1CC(O)C(=O)C2=C(C1)C(Br)=C(OC)C(O)=C2O</chem>        | Chembridge (Hit2Lead) | 8895247 | >90% | 20-70 | 0 |
|  | <chem>O[N+]1=C(C#N)C(C2=CC=CC=C2)=[N+](O)C2=C1C=C(F)C(F)=C2</chem> | Chembridge (Hit2Lead) | 8895724 | >90% | 20-70 | 0 |

|                                                                                     |                                                               |                          |                     |        |       |   |
|-------------------------------------------------------------------------------------|---------------------------------------------------------------|--------------------------|---------------------|--------|-------|---|
| 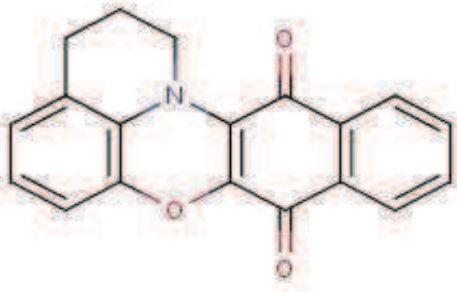   | <chem>O=C1C2=C(N3CCCC4=CC=CC(O2)=C34)C(=O)C2=C1C=CC=C2</chem> | Chembridge (Hit2Lead)    | 9001794             | >90%   | 20-70 | 0 |
|    | <chem>CC1=CC=C(C=C1)C1=NC2=CC=CC=C2N=C1</chem>                | Chembridge (Hit2Lead)    | 9032631             | >90%   | <20   | 0 |
|   | <chem>CC(=O)C1=[N+](O)C2=CC=C(C=C2)N1</chem>                  | Vitas-M Laboratory, Ltd. | MolPort-000-713-5   | >90%   | <20   | 0 |
|  | <chem>FC(F)(F)C1=CC(=CC=C1)N2C(=O)C(=O)C2</chem>              | InterBioScreen           | MolPort-000-635-294 | 92-95% | <20   | 0 |

|                                                                                     |                                                |                |                     |        |       |   |
|-------------------------------------------------------------------------------------|------------------------------------------------|----------------|---------------------|--------|-------|---|
| 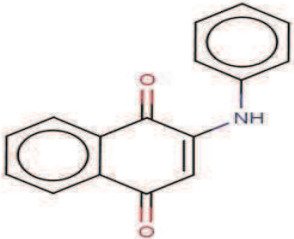   | <chem>O=C1C=C(NC2=CC=CC=C2)C(=O)C=C1</chem>    | InterBioScreen | MolPort-000-775-383 | 92-95% | 20-70 | 0 |
|    | <chem>CC1=C(O)C2=C(C(O)=O)C(=O)C=C2C1=O</chem> | InterBioScreen | MolPort-002-525-817 | 92-95% | 20-70 | 0 |
|    | <chem>CC1=CC(=O)c2c(O)c(O)cc2C1=O</chem>       | InterBioScreen | MolPort-002-525-117 | 92-95% | 90    | 1 |
|  | <chem>CC1=NC=NC2=C1N=CN2</chem>                | Sigma          | sigma M6502         | >99%   | <20   | 0 |



|                                                                                     |                                |                       |             |      |     |   |
|-------------------------------------------------------------------------------------|--------------------------------|-----------------------|-------------|------|-----|---|
| 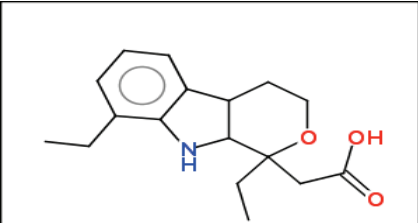   | <chem>CCC1=CC2=C(C=C1)C</chem> | Sigma                 | Sigma E0516 | >98% | <20 | 0 |
|    | <chem>CCNC1=NC(NC(C)C)=</chem> | Sigma                 | Sigma 45321 |      | <20 | 0 |
|    | <chem>COC(=O)COC1=CC2=C</chem> | Chembridge (Hit2Lead) | 5618162     | >90% | <20 | 0 |
|  | <chem>CCCC1=CC(=O)OC2=C</chem> | Chembridge (Hit2Lead) | 5753116     | >90% | <20 | 0 |

|                                                                                     |                                |                       |         |      |     |   |
|-------------------------------------------------------------------------------------|--------------------------------|-----------------------|---------|------|-----|---|
| 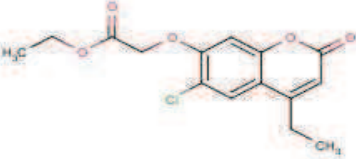   |                                | Chembridge (Hit2Lead) | 6653343 |      |     |   |
|                                                                                     | <chem>CCOC(=O)COC1=CC2</chem>  |                       |         | >90% | <20 | 0 |
|    |                                | Chembridge (Hit2Lead) | 6661898 |      |     |   |
|                                                                                     | <chem>CCCC1=CC(=O)OC2=</chem>  |                       |         | >90% | <20 | 0 |
|    |                                | Chembridge (Hit2Lead) | 6939246 |      |     |   |
|                                                                                     | <chem>CCC1=C(OCC(=O)OC)</chem> |                       |         | >90% | <20 | 0 |
|  |                                | Chembridge (Hit2Lead) | 7105644 |      |     |   |
|                                                                                     | <chem>CCC1=C(C)C2=C(OC1</chem> |                       |         | >90% | <20 | 0 |

|                                                                                     |                                                       |                       |              |      |     |   |
|-------------------------------------------------------------------------------------|-------------------------------------------------------|-----------------------|--------------|------|-----|---|
| 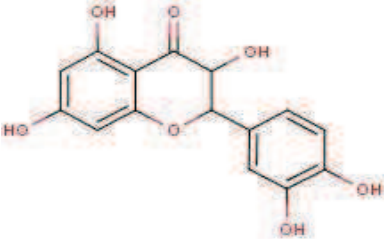   | <chem>OC1C(OC2=C(C(O)=C</chem>                        | Chembridge (Hit2Lead) | 6101281      | >90% | <20 | 0 |
|    | <chem>C=CCN1C(=N)S\C(C1=</chem>                       | Chembridge (Hit2Lead) | 5679728      | >90% | <20 | 0 |
|    | <chem>NC1=CC(O)=C(C=C1)C(=O)O</chem>                  | Sigma                 | Sigma A79604 |      | <20 | 0 |
|  | <chem>CC1=CC(=O)C2=C(C=C1)C(=O)C=C2C3=CC=CC=C3</chem> | Sigma                 | Sigma M5625  |      | 90  | 1 |

|                                                                                   |                                |       |             |      |     |   |
|-----------------------------------------------------------------------------------|--------------------------------|-------|-------------|------|-----|---|
| 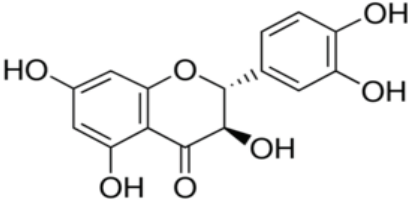 | <chem>OC1C(OC2=C(C(O)=C</chem> | Sigma | Sigma 78666 | >85% | <20 | 0 |
|  | <chem>COC1C(OC)C(=O)C(C</chem> | Sigma | Sigma I5659 | >98% | 90  | 1 |

**Supplementary Table 7.** Bayesian scores and experimental results for NQs in a test set.

a = Bayesian score, higher values are better, b = scores greater than 3.399 = active, c = closest distance to compounds in training set, d = actual measured data. Note that higher Bayesian scores based on the features in each molecule scored as active or inactive predict more reliably inhibition.

| Structure                                                                           | Code | Bayesian Score <sup>a</sup> | Prediction for activity <sup>b</sup> | Closest distance <sup>c</sup> | % of ThyX inhibition at 100 $\mu$ M <sup>d</sup> |
|-------------------------------------------------------------------------------------|------|-----------------------------|--------------------------------------|-------------------------------|--------------------------------------------------|
| 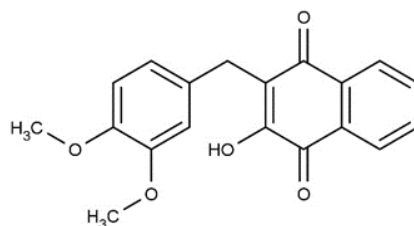  | 010K | 5.23                        | TRUE                                 | 0.56                          | 42                                               |
|  | 010I | 1.88                        | FALSE                                | 0.16                          | 58                                               |
|  | 010H | 3.89                        | TRUE                                 | 0.62                          | 41                                               |
|  | 010F | 8.6                         | TRUE                                 | 0.44                          | 73                                               |

|                                                                                     |      |       |       |      |    |
|-------------------------------------------------------------------------------------|------|-------|-------|------|----|
| 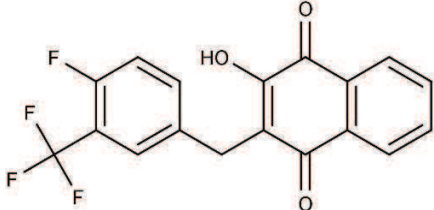   | 010E | 7.81  | TRUE  | 0.44 | 32 |
|    | 010D | 3.68  | TRUE  | 0.67 | 42 |
|   | 010C | 2.72  | FALSE | 0.62 | 60 |
|  | 010B | 6.18  | TRUE  | 0.44 | 68 |
|  | 010A | 10.13 | TRUE  | 0.45 | 64 |
|  | 007G | 5.73  | TRUE  | 0.59 | 89 |

|                                                                                     |      |      |      |      |    |
|-------------------------------------------------------------------------------------|------|------|------|------|----|
| 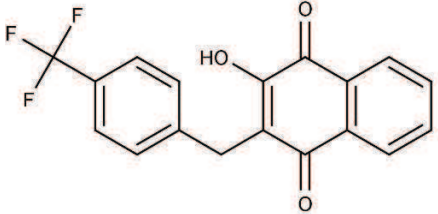   | 007F | 7.37 | TRUE | 0.45 | 74 |
|    | 007D | 8.28 | TRUE | 0.50 | 71 |
|   | 007C | 8.23 | TRUE | 0.57 | 78 |
|  | 007B | 6.48 | TRUE | 0.66 | 21 |

**Supplementary Table 8.** Strains used to test the whole-cell activity of the NQs in the test set for the Bayesian model.

| Strain          | MIC ( $\mu\text{M}$ ) |       | Resistance |
|-----------------|-----------------------|-------|------------|
|                 | RMP                   | INH   |            |
| <b>H37Rv</b>    | <0.030                | <0.91 | none       |
| <b>MT 182</b>   | 1.21                  | <0.91 | RMP        |
| <b>TC 12561</b> | 4.86                  | 14.58 | RMP+ INH   |
| <b>TH 12526</b> | <0.30                 | <0.91 | none       |
| <b>TH12768</b>  | <0.30                 | 3.64  | INH        |

*RMP- rifampicin, INH- isoniazid, RMP MIC is 0.5  $\mu\text{g/ml}$  and INH MIC is 0.25  $\mu\text{g/ml}$ <sup>[21]</sup>*



**Supplementary Table 9.** Antibacterial activities of the fourteen NQs in the test set.

| Compound    | MIC ( $\mu\text{M}$ ) |        |          |          |          |
|-------------|-----------------------|--------|----------|----------|----------|
|             | H37Rv                 | MT 182 | TC 12561 | TH 12526 | TH 12768 |
| <b>010A</b> | 52.3                  | 104.6  | 52.3     | 52.3     | 104.6    |
| <b>007B</b> | 20.8                  | 83.4   | 83.4     | 41.7     | 41.7     |
| <b>010B</b> | 104.1                 | 104.1  | 104.1    | 104.1    | 52.1     |
| <b>007C</b> | 89.7                  | 44.9   | 44.9     | 44.9     | 44.9     |
| <b>010C</b> | 176.5                 | 176.5  | 176.5    | 176.5    | 176.5    |
| <b>007D</b> | 96.9                  | 96.9   | 96.9     | 96.9     | 96.9     |
| <b>010D</b> | 231.2                 | 462.4  | 57.8     | 231.2    | 231.2    |
| <b>010E</b> | 22.3                  | 22.3   | 22.3     | 22.3     | 22.3     |
| <b>007F</b> | 94.1                  | 94.1   | 47.0     | 47.0     | 94.1     |
| <b>010F</b> | 197.3                 | 98.7   | 49.3     | 98.7     | 197.3    |
| <b>007G</b> | 175.5                 | 87.8   | 87.8     | 87.8     | 175.5    |
| <b>010H</b> | 201.4                 | 100.7  | 201.4    | 201.4    | 201.4    |
| <b>010I</b> | 135.7                 | 135.7  | 271.4    | 67.8     | 135.7    |
| <b>010K</b> | 192.7                 | 385.4  | 192.7    | 48.2     | 192.7    |
